# Supplementary material for: A theoretical investigation of uranyl covalencyviasymmetry-preserving excited state structures
Source: Royal Society of Chemistry journal article supplement (doi:10.1039/d2cp02878f), 2022-01-01
Supplement: d2cp02878f1.pdf [file d2cp02878f1.pdf]

A theoretical investigation of uranyl covalency via symmetry-preserving excited state structures

Sapphire Armstrong <sup>a</sup>, Thomas Malcomson <sup>b</sup> and Andy Kerridge <sup>\*a</sup>

<sup>a</sup> Department of Chemistry, Faraday Building, Lancaster University, Lancaster, LA1 4YB, UK.

<sup>b</sup> Department of Chemistry, University of Manchester, Oxford Road, Manchester, M13 9PL, UK

Electronic supplementary information

**Table S1.** Integrated QTAIM metrics; charge ( $q$ ), localisation (LI) and delocalisation (DI) indices at the ground and excited state electronic structures.

| Excitation                        | q(U)  | q(O)   | LI(U)  | LI(O) | DI(U,O) |
|-----------------------------------|-------|--------|--------|-------|---------|
| Ground State                      | 3.153 | -0.576 | 26.814 | 7.476 | 2.045   |
| $\pi_u \rightarrow \pi_u^*$       | 3.102 | -0.551 | 27.210 | 7.661 | 1.692   |
| $\sigma_u \rightarrow \sigma_u^*$ | 3.046 | -0.523 | 27.138 | 7.569 | 1.816   |
| $\pi_g \rightarrow \pi_g^*$       | 2.972 | -0.486 | 27.093 | 7.459 | 1.943   |
| $\sigma_g \rightarrow \sigma_g^*$ | 3.367 | -0.683 | 26.470 | 7.373 | 2.174   |

**Table S2.** Topological QTAIM metrics at the ground and excited states electronic structures at the ground state geometry

| Excitation                        | $\rho_{BCP}$ (a.u.) | $\nabla^2 \rho_{BCP}$ (a.u.) | H (a.u.) |
|-----------------------------------|---------------------|------------------------------|----------|
| Ground State                      | 0.332               | 0.529                        | -0.347   |
| $\pi_u \rightarrow \pi_u^*$       | 0.358               | 0.312                        | -0.394   |
| $\sigma_u \rightarrow \sigma_u^*$ | 0.359               | 0.565                        | -0.394   |
| $\pi_g \rightarrow \pi_g^*$       | 0.364               | 0.236                        | -0.404   |
| $\sigma_g \rightarrow \sigma_g^*$ | 0.338               | 0.381                        | -0.356   |

**Table S3.** Integrated QTAIM metrics; charge ( $q$ ), localisation (LI) and delocalisation (DI) indices at the excited state geometries for each state of interest.

| Excitation                        | q(U)  | q(O)   | LI(U)  | LI(O) | DI(U,O) |
|-----------------------------------|-------|--------|--------|-------|---------|
| $\pi_u \rightarrow \pi_u^*$       | 3.031 | -0.515 | 27.342 | 7.653 | 1.634   |
| $\sigma_u \rightarrow \sigma_u^*$ | 2.846 | -0.423 | 27.621 | 7.628 | 1.535   |
| $\pi_g \rightarrow \pi_g^*$       | 2.738 | -0.369 | 27.376 | 7.365 | 1.892   |
| $\sigma_g \rightarrow \sigma_g^*$ | 3.318 | -0.658 | 26.538 | 7.363 | 2.155   |

**Table S4.** Topological QTAIM metrics at the excited state geometries for each state of interest

| Excitation                        | $\rho_{BCP}$ (a.u.) | $\nabla^2\rho_{BCP}$ (a.u.) | H (a.u.) |
|-----------------------------------|---------------------|-----------------------------|----------|
| $\pi_u \rightarrow \pi_u^*$       | 0.265               | 0.333                       | -0.216   |
| $\sigma_u \rightarrow \sigma_u^*$ | 0.250               | 0.447                       | -0.188   |
| $\pi_g \rightarrow \pi_g^*$       | 0.235               | 0.350                       | -0.164   |
| $\sigma_g \rightarrow \sigma_g^*$ | 0.300               | 0.410                       | -0.283   |

**Table S5.** QTAIM metrics at both the ground and excited state geometries for the optically accessible excitation. All QTAIM metrics are in a.u. with the exception of the

| Geometry      | $\Delta q(U)$ | $\Delta q(O)$ | $\Delta LI(U)$ | $\Delta LI(O)$ | $\Delta DI(U,O)$ | $\Delta\rho_{BCP}$ | $\Delta\nabla^2\rho_{BCP}$ | $\Delta H$ |
|---------------|---------------|---------------|----------------|----------------|------------------|--------------------|----------------------------|------------|
| Ground State  | 3.150         | -0.575        | 26.747         | 7.403          | 2.108            | 0.334              | 0.511                      | -0.350     |
| Excited State | 3.031         | -0.515        | 27.342         | 7.653          | 2.099            | 0.296              | 0.488                      | -0.278     |

(de)localisation indices, which are dimensionless.
